# Supplementary material for: Whitefly genomes contain ribotoxin coding genes acquired from plants
Source: PubMed Central journal article supplement (PMC7511414; doi:10.1038/s41598-020-72267-1), 2020-09-23
Supplement: 41598_2020_72267_MOESM1_ESM.pdf [file 41598_2020_72267_MOESM1_ESM.pdf]

# Whitefly genomes contain ribotoxin coding genes acquired from plants

Walter J. Lapadula\*, María Laura Mascotti, Maximiliano Juri Ayub\*

IMIBIO-SL CONICET, Facultad de Química Bioquímica y Farmacia, Universidad Nacional de San Luis, Ejército de los Andes 950, D5700HHW, San Luis, Argentina.

\*Correspondence and requests for materials should be addressed to W.J.L (e-mail: [wlapadula@gmail.com](mailto:wlapadula@gmail.com)) or M.J.A. (e-mail: [mjuriayub@hotmail.com](mailto:mjuriayub@hotmail.com))

---

**Supplementary information**

Supplementary Table 1. Contig region containing BRIP genes. Annotated proteins GenPept cdes of *B. robocri* are shown along with their location in different genome databases. The highest identity hit in BLASTP searches for each protein is indicated, along with the identity percent and coverage percent.

| Annotation                                                 | Arrow code Figure 1 A | GenPept      | Closest BLASTP | Organism                       | Id (%)/QC (%) | Orientation according to NW_017547285 | NW_017547285                |         |                 | PGTPO1000858               |        |                 | ML134445                    |        |                 |
|------------------------------------------------------------|-----------------------|--------------|----------------|--------------------------------|---------------|---------------------------------------|-----------------------------|---------|-----------------|----------------------------|--------|-----------------|-----------------------------|--------|-----------------|
|                                                            |                       |              |                |                                |               |                                       | <i>Bemisia tabaci</i> MEAM1 |         |                 | <i>Bemisia tabaci</i> SSA1 |        |                 | <i>Bemisia tabaci</i> MCO-Q |        |                 |
|                                                            |                       |              |                |                                |               |                                       | Initiation                  | End     | Gen length (bp) | Initiation                 | End    | Gen length (bp) | Initiation                  | End    | Gen length (bp) |
| elongation of very long chain fatty acids protein 7-1      | A                     | XP_018902197 | VVC28064       | <i>Cinara cedri</i>            | 48/93         | -                                     | 985766                      | 992173  | 6407            | 199829                     | 206692 | 6863            | 165303                      | 172259 | 6956            |
| elongation of very long chain fatty acids protein 7-1      | B                     | XP_018902200 | XP_015364617   | <i>Diuraphis noxia</i>         | 51/97.7       | -                                     | 993246                      | 1009513 | 16267           | 186383                     | 196288 | 11905           | 179925                      | 187284 | 7359            |
| ribosome-inactivating protein                              | C                     | XP_018902206 | XP_002619608   | <i>Helicoverpa zea</i>         | 37/58.9       | -                                     | 1027989                     | 1027989 | 3284            | NA                         | NA     | NA              | NA                          | 152684 | 2590            |
| rabenosyn-5                                                | D                     | XP_018902267 | XP_014271881   | <i>Halymorpha halys</i>        | 50/94.4       | +                                     | 1034969                     | 1044873 | 9904            | 152706                     | 162699 | 9993            | 123566                      | 133452 | 9886            |
| protein Y1P6                                               | E                     | XP_018902269 | XP_023722963   | <i>Cryptotermes secundus</i>   | 67/98.3       | -                                     | 1046825                     | 1051805 | 4980            | 146162                     | 151093 | 4931            | 116371                      | 121278 | 4908            |
| TFIID subunit 1-like                                       | F                     | XP_018902266 | PNF40462       | <i>Cryptotermes secundus</i>   | 66/99.7       | +                                     | 1052478                     | 1080660 | 27882           | 118682                     | 145465 | 26783           | 89677                       | 115706 | 26029           |
| IMiR fusion partner-like 3                                 | G                     | XP_018902290 | XP_023715865   | <i>Cryptotermes secundus</i>   | 71/100        | -                                     | 1087652                     | 1089807 | 2135            | 105245                     | 111375 | 2130            | 79739                       | 81871  | 2132            |
| ubiquitin carboxyl-terminal hydrolase 16                   | H                     | XP_018902226 | XP_030036242   | <i>Manduca sexta</i>           | 34/100        | +                                     | 1093723                     | 1108974 | 15251           | 88677                      | 105921 | 17244           | 60327                       | 76392  | 16065           |
| coiled-coil domain-containing protein 93 isoform X1        | I                     | XP_018902228 | XP_022184911   | <i>Nilaparvata lugens</i>      | 47/98.6       | -                                     | 1113316                     | 1128262 | 14946           | 69713                      | 83924  | 14211           | 40005                       | 54622  | 14617           |
| hoxy-6-polyphenyl-1,4-benzoquinol methylase, mitochondrion | J                     | XP_018902233 | RZF39936       | <i>Laelophax striatellus</i>   | 70/92.1       | +                                     | 1128922                     | 1129800 | 878             | 68198                      | 69074  | 878             | 18484                       | 19359  | 878             |
| 2-phosphorylase phosphatase 1                              | K                     | XP_018902210 | XP_023717146   | <i>Cryptotermes secundus</i>   | 45/98.6       | -                                     | 1131522                     | 1135731 | 3609            | 63248                      | 64880  | 3632            | 31851                       | 36346  | 4455            |
| TBC1 domain family member 13                               | L                     | XP_018902284 | XP_023712160   | <i>Cryptotermes secundus</i>   | 72/96.9       | -                                     | 1143805                     | 1152910 | 9105            | 46521                      | 53455  | 6934            | 20863                       | NA     | NA              |
| ribosome-inactivating protein luffaculin 1-like            | M                     | XP_018902288 | AAR15568       | <i>Gynostemma pentaphyllum</i> | 34/64.4       | +                                     | 1158736                     | 1161290 | 2554            | 37269                      | 40465  | 3196            | 10307                       | 12611  | 2304            |
| HM/homeobox protein Awb isoform X1                         | N                     | XP_018902192 | RZF48072       | <i>Laelophax striatellus</i>   | 78/93.9       | +                                     | 1202084                     | 1240031 | 109647          | NA                         | NA     | NA              | NA                          | NA     | NA              |
| ubiquitin carboxyl-terminal hydrolase isozyme L3           | O                     | XP_018902286 | XP_023724885   | <i>Cryptotermes secundus</i>   | 90.7          | -                                     | 1248855                     | 1359235 | 8340            | NA                         | NA     | NA              | NA                          | NA     | NA              |
| uncharacterised protein CD1161 isoform X1                  | P                     | XP_018902286 | XP_024214830   | <i>Halymorpha halys</i>        | 60/97.5       | +                                     | 1358825                     | 1363863 | 5038            | NA                         | NA     | NA              | NA                          | NA     | NA              |

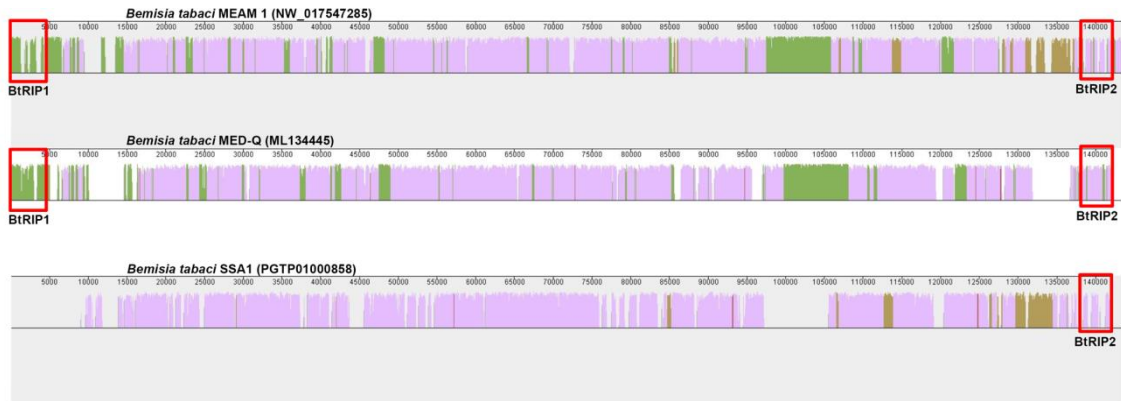

**Figure S1.** Scheme depicting the *B. tabaci* genomic region harboring *BtRIP1* and *BtRIP2* genes. The contig region containing *RIP* genes from *B. tabaci* MEAM 1 (NW017547285), *B. tabaci* MED/Q (ML134445) and *B. tabaci* SSA-ECA (PGTP01000858) were compared using MAUVE software [1]. Sections of the similarity plot colored in violet are conserved among all three genomes; portions in green are conserved among the MEAM 1 and MED-Q sequences, segments conserved among MEAM 1 and SSA 1 are colored in brown. Empty spaces represent regions with no sequence available. Regions corresponding to *BtRIP1* and *BtRIP2* are indicated with red boxes.

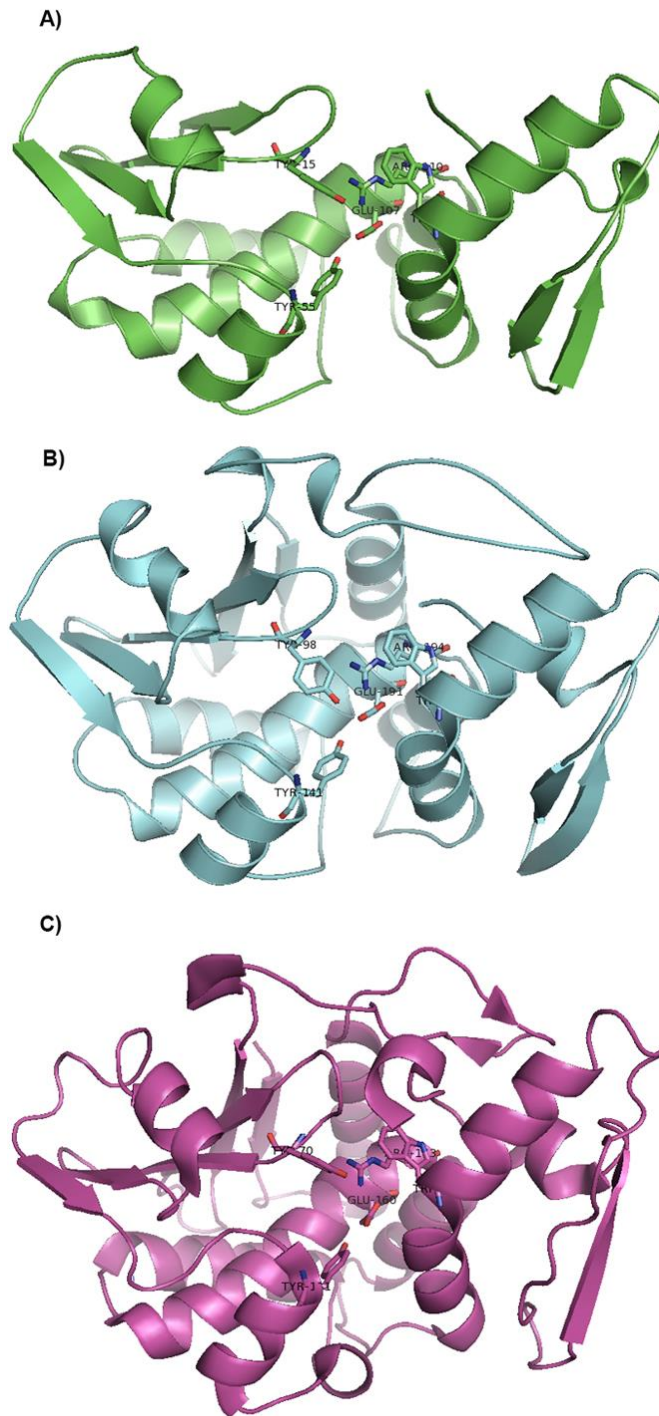

**Figure S2. Homology models of BtRIP1 and BtRIP2.** Models were constructed in Swiss-Model server [2]. Structures of momordin (PDB 3MY6 or 4YP2) displaying 30-32% sequence identity were used as templates for both BtRIP1 and BtRIP2. **A.** Homology model of BtRIP1 (green). **B.** Homology model of BtRIP2 (cyan) **C.** Structure of momordin PDB 3MY6 (magenta). Active site residues (Y, Y, E, R, W) are numbered and shown as sticks.

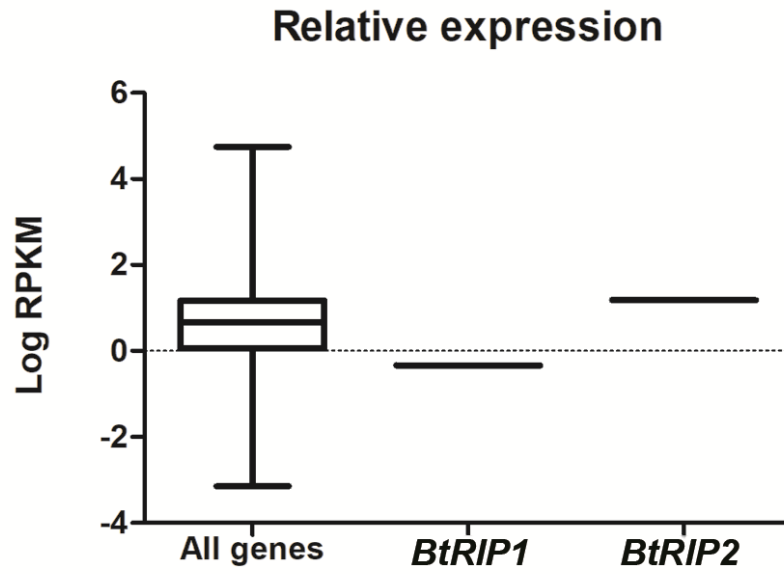

**Figure S3. Expression level of *BtRIPs*.** Data provided by Dr. Dr. Zhangjun Fei were plotted as log of RPKM. Values of *BtRIP1* and *BtRIP2* were compared with the whole set of *B. tabaci* genes according to Chen *et al.* [3]. The box-and-whisker plot shows expression levels as quartiles.
